# Supplementary material for: A novel supramolecular assembly in an iron(iii) compound exhibiting magnetic ordering at 70 K
Source: Royal Society of Chemistry journal article supplement (doi:10.1039/b402055c), 2004-01-01
Supplement: b402055c.doc [file b402055c.doc]

### **A Novel Supramolecular Assembly in a Iron(III) compound Exhibiting Magnetic Ordering at 70 K**

### Donatella Armentano *a*, Giovanni De Munno**a*, Teresa F. Mastropietro *a*, Miguel Julve**b* and Francesc Lloret*b*

### a *Dipartimento di Chimica, Università degli Studi della Calabria, 87030 Arcavacata di Rende, Cosenza, Italy. E-mail:* [*demunno@unical.it*](mailto:demunno@unical.it)

### *b Departament de Química Inorgànica/Instituto de Ciencia Molecular, Faculat de Química de la Universitat de València, Avda. Dr. Moliner 50, 46100 Burjassot,(València) Spain. E-mail:* [*miguel.julve@uv.es*](mailto:miguel.julve@uv.es)

**Supplementary Material**


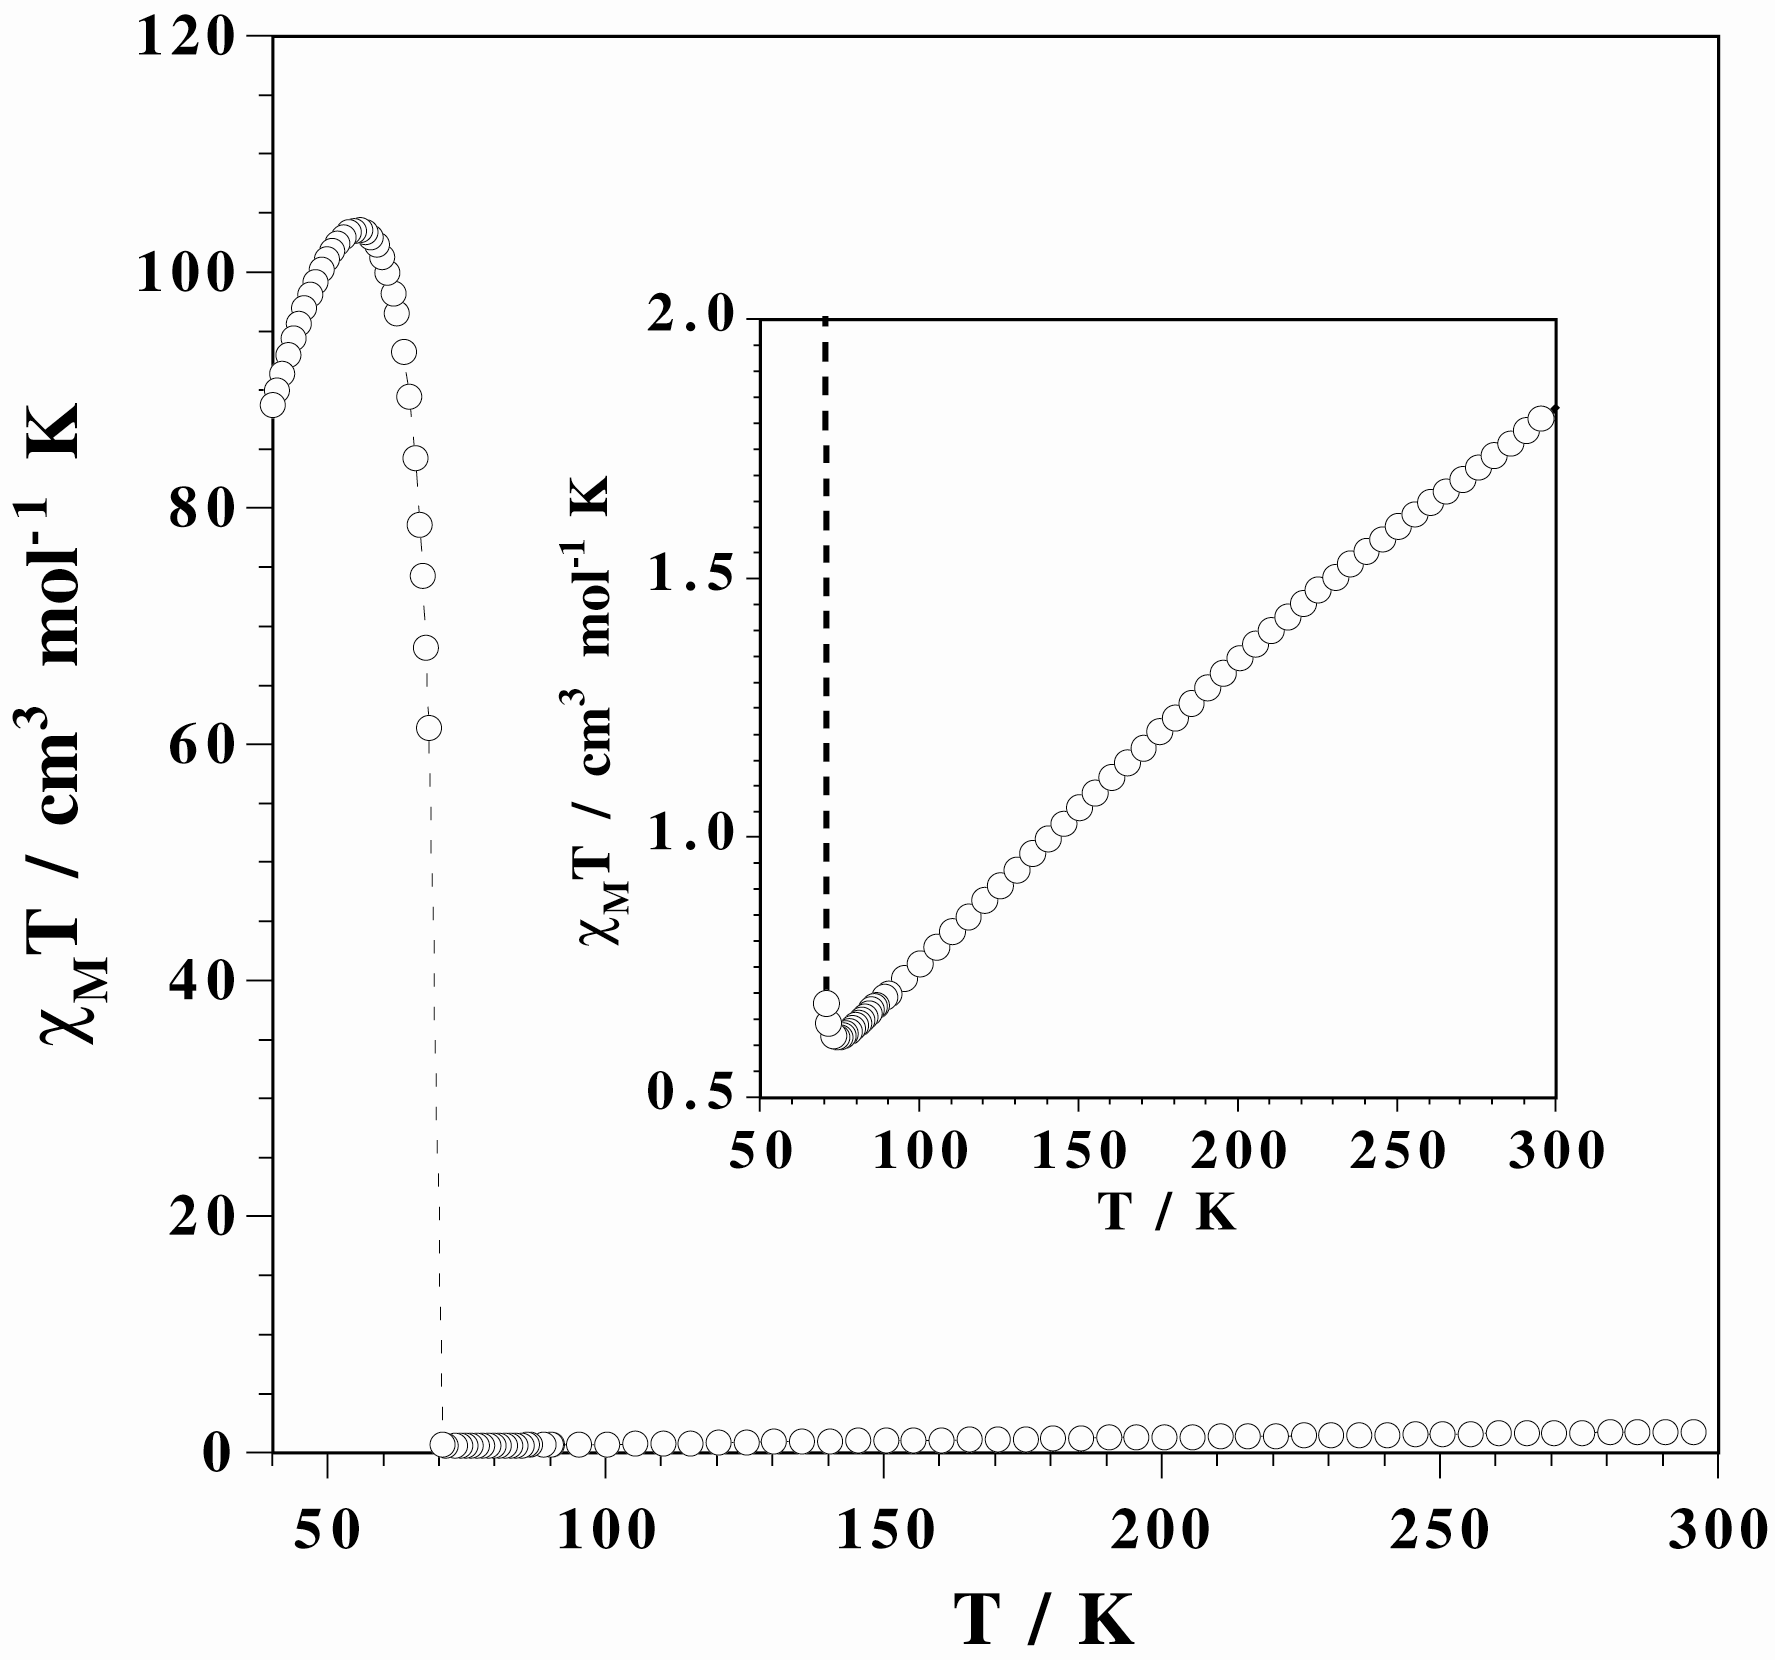


**Figure S1**. Thermal dependence of χMT (o) per mol of iron(III) for **2** under an applied field of 50 Oe. The inset shows the higher temperature range including the minimum of χMT. The dashed line is a guideline.

**
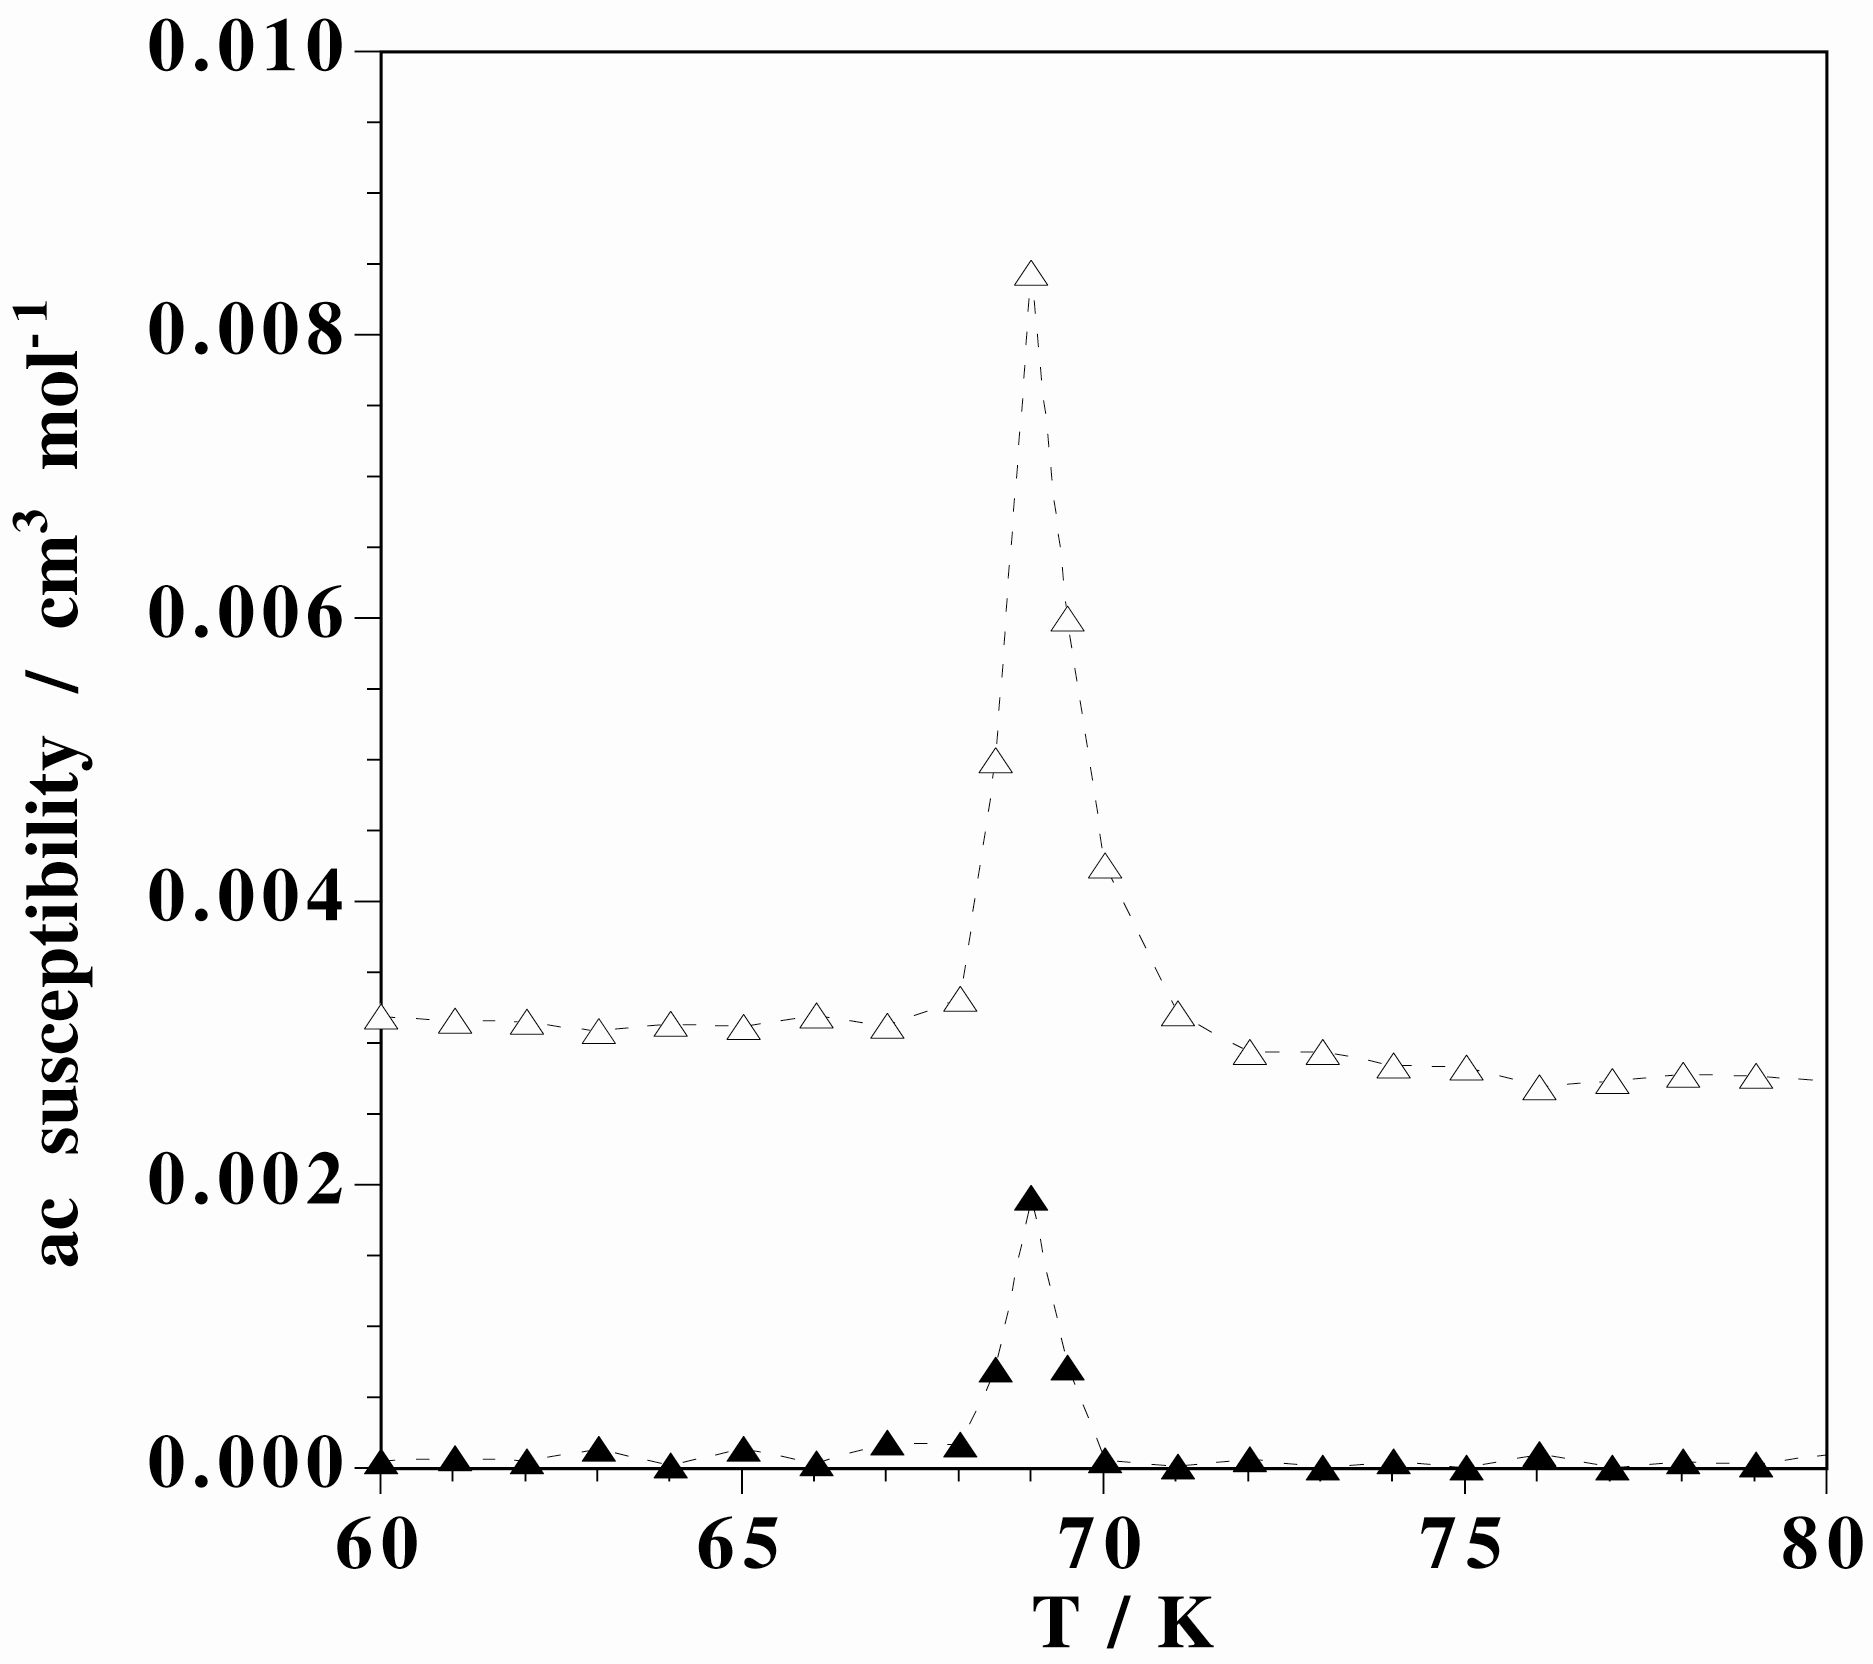
**

**Figure S2**. Temperature dependence of the in-phase (top) and out-phase (bottom) components of the ac susceptibility of **2** at 100 Hz in zero applied static field and under an oscillating field of 1 Oe.

**
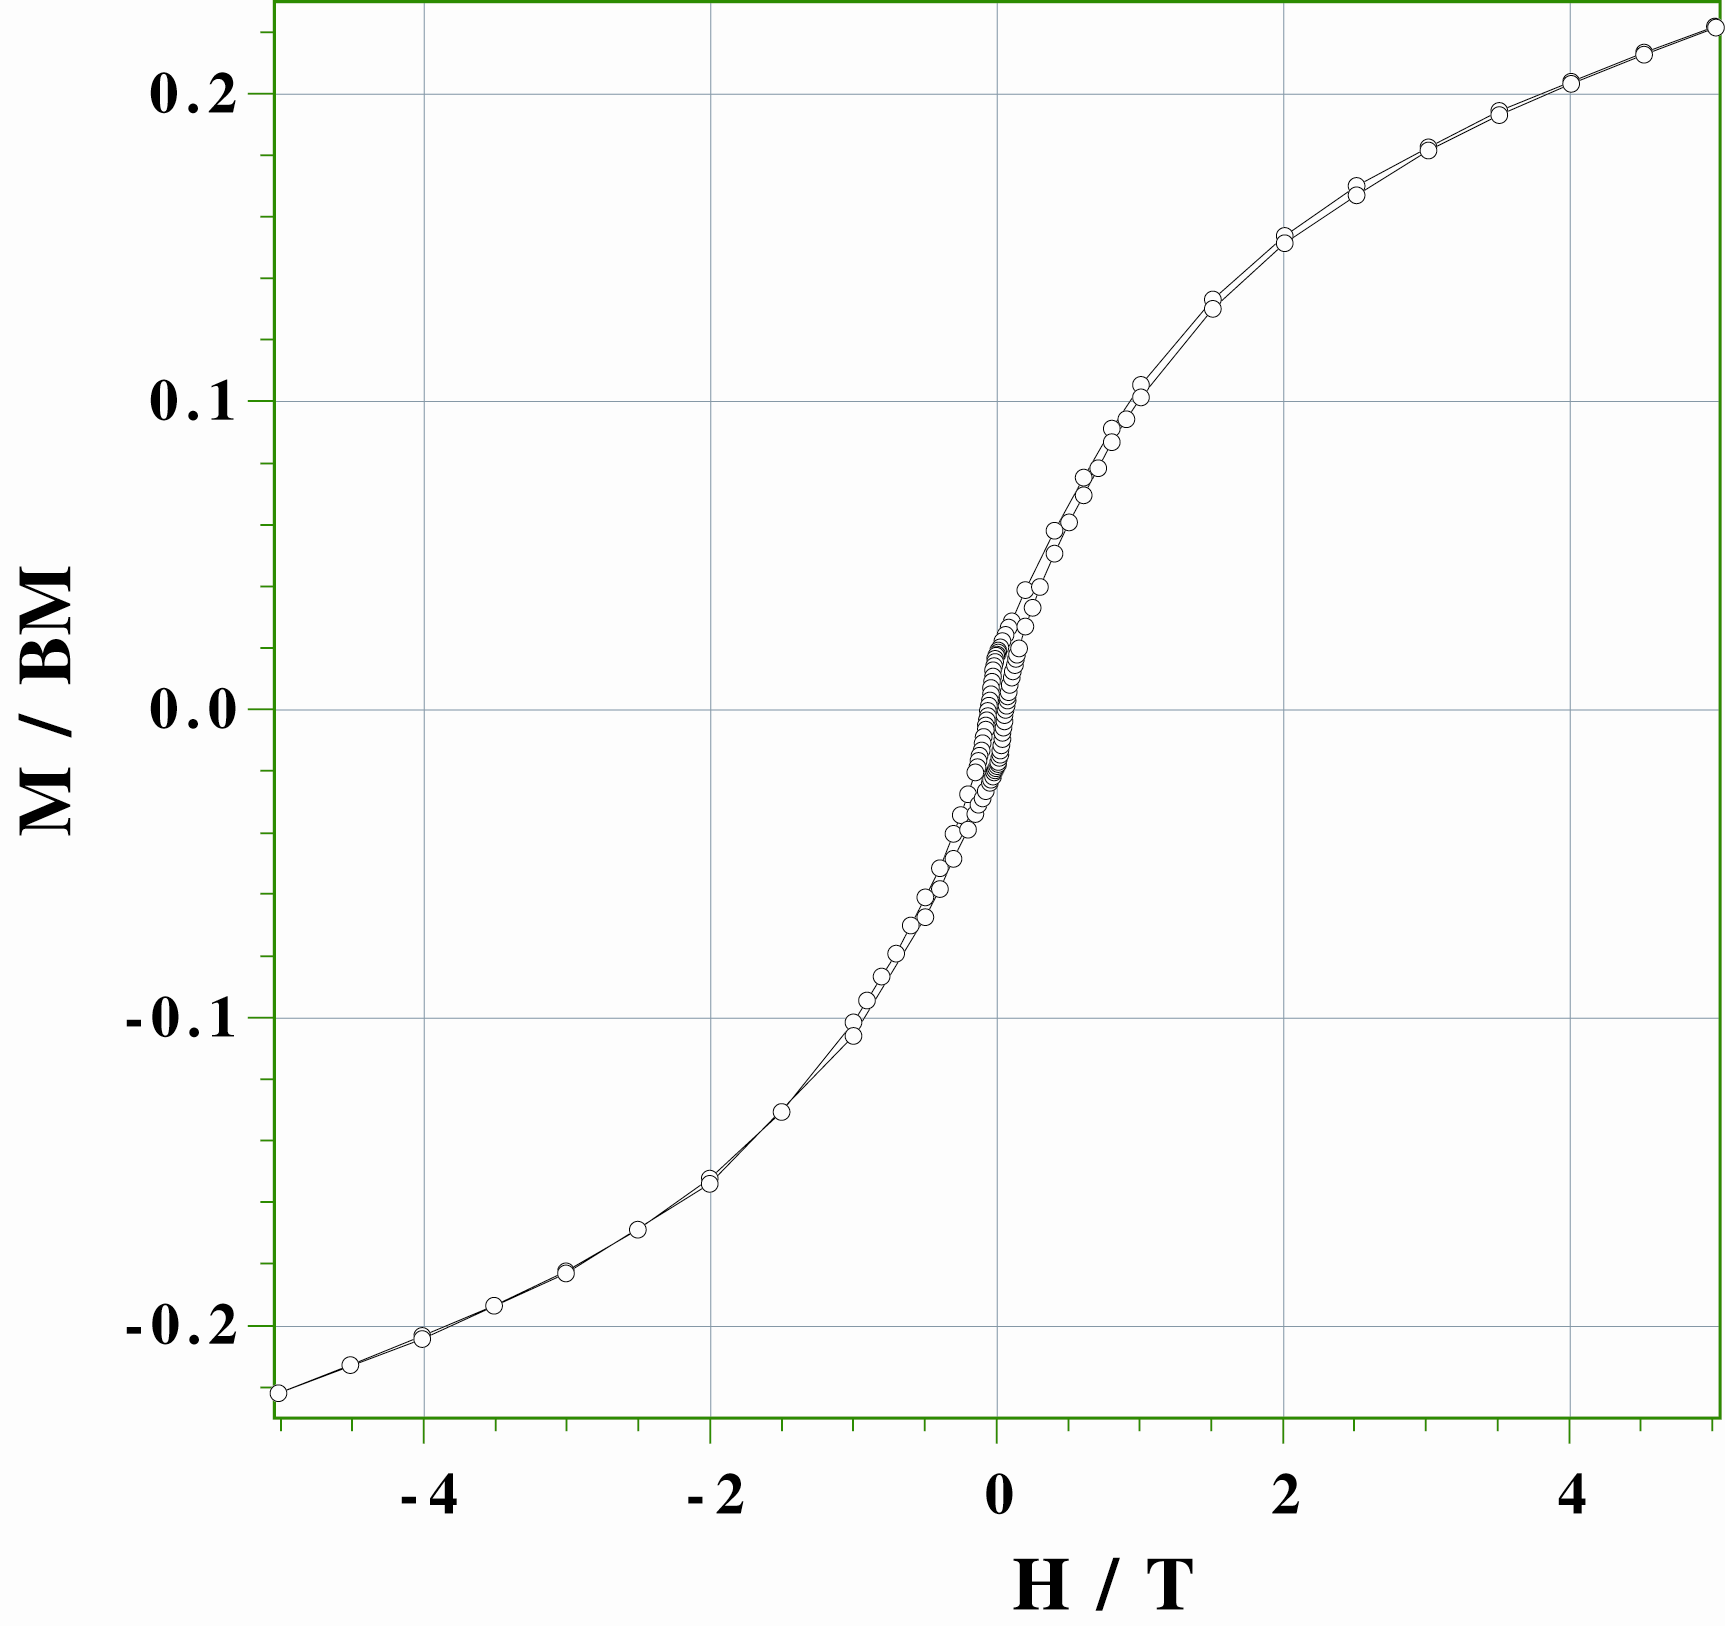
**

**Figure S3**. Hysteresis loop of **2** at 2.0 K between ±5 T.
